# Supplementary material for: The core clock transcription factor BMAL1 drives circadian β-cell proliferation during compensatory regeneration of the endocrine pancreas
Source: PubMed Central journal article supplement — Genes Dev. 2020 Dec 1;34(23-24):1650–65. doi: 10.1101/gad.343137.120 (PMC7706703; doi:10.1101/gad.343137.120), 2020-12-01

## Supplemental Methods

### ***In vitro* mouse islets/islet cell culture, synchronization, and bioluminescence monitoring**

For *in vitro* culture, the intact islets, dissociated or sorted cells were recovered in RPMI 1640 complete medium (11.2 mM glucose, 110 µg/mL sodium pyruvate) supplemented with 10 % fetal calf serum, 110 units/mL penicillin, 110 µg/mL streptomycin, and 50 µg/mL gentamycin and attached to 35 mm dishes or multi-well plates, pre-coated with a laminin-5-rich extracellular matrix (Parnaud et al., 2008). Adherent islets/cells were synchronized by a 1 h pulse of forskolin 10 µM (Sigma) prior to continuous bioluminescence recording in RPMI supplemented with 100 µM luciferin (NanoLight Technology). For detrended time series, raw luminescence signals were processed by a moving average with a window of 24 h (Petrenko et al., 2017).

## Supplemental Figure Legends

**Figure S1. Experimental outline.** (A) Quintuple transgenic mice (*ProGcg-Venus/RIP-Cherry/Per2::Luc/rtTA/TET-DTA*) were kept at standard 12/12 h light-dark cycle conditions. Animals were subjected to night-restricted feeding two weeks prior to the islet collection and during the entire experiment time, with constant and unrestricted access to drinking water. Experimental animals (doxycycline, DOX group) received 300 µg/ml of doxycycline (DOX) in the drinking water supplemented with 2 % sucrose during the entire experiment time (7-10 days). Control animals (CTR) received drinking water supplemented with 2 % sucrose during the same period. ZT0 (*Zeitgeber*) corresponds to 7AM, the time of light switch-on in the animal facility, and ZT12 to 7PM, the time of light switch-off. Pancreatic islets were isolated between 12 and 14 days following DOX treatment, around-the-clock every 4 h during 24 h. Pancreatic islet isolation was performed from 2-4 animals per replicate in two independent experiments at each time point

(total of 4-8 animals per time point), with subsequent gently trypsinization and separation of  $\alpha$ - and  $\beta$ -cells by FACS. RNA was extracted from two cell populations obtained at each time point and subjected to RNA sequencing (RNA-seq) and qPCR analyses. Blood sampling was conducted at the same time-points across 24 h to measure the blood levels of glucose, insulin, and glucagon. (B) Ratio (R) between FACS-separated  $\alpha$ - and  $\beta$ -cells in control and DOX-treated groups. Data are expressed as mean  $\pm$  SEM for n = 10 preparations. (C) Glycemic profile of mice at 7, 9, and 14 days following DOX treatment. (D) Proliferation of  $\beta$ -cells in response to massive ablation. The number of BrdU/Insulin double-positive cells within insulin-labeled population across all samples shown in Figure 1A (CTR and DOX group, 6 time-points per group, 3 mice per time-point, total of 36 samples). Data are expressed as mean  $\pm$  SEM for n = 36 mice per phenotype. The difference was tested using Students t-test; \*\*\*p<0.001.

**Figure S2. Enlarged split channel view of the confocal images of the islets from DOX-treated triple-DTA mice at ZT8 and ZT16 shown on Figure 1A.** Localization of proliferation marker BrdU in insulin-producing  $\beta$ -cells is indicated by arrows. Scale bar = 50  $\mu$ m.

**Figure S3. Differential analysis of gene expression in  $\alpha$ - and  $\beta$ -cells following massive  $\beta$ -cell ablation.** (A, C) Volcano plots representing transcripts that were differentially expressed between  $\alpha$ - and  $\beta$ -cells in CTR (A) and DOX (C) groups. For differential analysis, the average across 6 points per each of 4 conditions ( $\alpha$ - and  $\beta$ -cells, treated or not with DOX) was considered. Upregulated genes are labeled in green; downregulated are in red. Size of dots corresponds to the  $\text{Log}_{10}$  p value. (B, E) Histograms presenting number of differentially expressed (up- and downregulated genes) between  $\alpha$ - and  $\beta$ -cells in CTR (B) and DOX (E) groups at each of 6 time-points (see Figure S1A for experimental design). (D) KEGG pathway enrichment analysis of

differentially expressed transcripts between  $\alpha$ - and residual  $\beta$ -cells after ablation showing significance ( $-\log_{10}$  p-value, x-axis) for indicated pathway (y-axis).

**Figure S4. Changes in core-clock machinery in residual  $\beta$ -cells following ablation.** (A) Results of KEGG pathway enrichment analysis of  $\beta$ -cells transcripts that showed phase-difference between CTR and DOX groups of -2 and +2 h, with indicated significance ( $-\log_{10}$  p-value, x-axis) for indicated pathway (y-axis). (B-C) Average PER2::Luc oscillation profiles of forskolin-synchronized islets (B, n = 4 independent experiments) and dispersed islet cells (n = 1 experiment, isolated from 3 mice) recorded with lumicycle. Data are presented as detrended values, obtained as described in details in (Pulimeno et al., 2013). (D-E) Temporal profiles of *MafA* (D) and *Wee1* (E) transcripts in sorted  $\beta$ -cells with and without DOX treatment. Data are expressed as mean  $\pm$  SD for two experimental repetitions per each time-point, with at least 3 mice in each replicate.

**Figure S5. RNAseq analysis of  $\beta$ -cells in *Bmal1*<sup>st/st</sup> mice following massive  $\beta$ -cell ablation.** (A) Schematic representation of the *Bmal1* stop-cassette knock-in allele. SA, splice acceptor; 3xpA, triple repeat of a polyadenylation signal sequence; Triangles, *LoxP* sites. (B) Average PER2::Luc oscillation profiles of forskolin-synchronized islets isolated from *Bmal1*<sup>st/st</sup> and *Bmal1*<sup>+/st</sup> mice (n = 4 independent experiments) recorded with lumicycle. Data are presented as detrended values. (C) *Bmal1* (*Arntl*) gene reads coverage based on raw RNA-seq data, indicating weak reads coverage starting from the 5th exon in *Bmal1*<sup>st/st</sup>DOX mice (labelled as *Bmal1*KO\_DOX) as compared to heterozygotes counterparts (labelled as *Bmal1*Het\_DOX). (D) IPA generated Top 5 canonical pathways based on differentially expressed genes between *Bmal1*<sup>st/st</sup>DOX and *Bmal1*<sup>+/st</sup>DOX mice. (E) IPA-generated Circadian Rhythm Canonical Pathway displaying core-clock components within circadian rhythm pathway differentially expressed between two groups. (F) *Arntl* (*Bmal1*)-centered IPA-generated top network based on RNA-seq differential expression

data (Dataset S7). (G) KEGG pathway enrichment analysis of differentially expressed transcripts between *Bmal1*<sup>+/<sup>st</sup>DOX and *Bmal1*<sup>st/st</sup>DOX residual  $\beta$ -cells after ablation showing significance ( $-\log_{10}$  p-value, x-axis) for indicated pathway (y-axis).</sup>

**Figure S6. Parameters of glucose metabolism in *Bmal1*<sup>+/<sup>st</sup> and *Bmal1*<sup>st/st</sup> mice.</sup>** Assessment of blood glucose (A), insulin (B) and glucagon (C) levels in *Bmal1*<sup>+/<sup>st</sup> mice (*proGcg-Venus/RIP-Cherry/PER2::Luc/Insulin-rtTA/TET-DTA*, no DOX treatment) and in *Bmal1*<sup>st/st</sup> (*Bmal1*<sup>st/st</sup>DTA, no DOX treatment) mice at ZT4. Data are expressed as Mean  $\pm$  SEM for n = 8-18 mice per group. Student's t-test comparisons were applied, difference between groups was non-significant.</sup>

**Figure S7. High resolution and split channel view of the representative confocal images of *Bmal1*<sup>st/st</sup>DOX and *Bmal1*<sup>+/<sup>st</sup>DOX islets shown on Figure 5B.</sup>** Localization of proliferation marker BrdU in insulin-producing  $\beta$ -cells is indicated by arrows. Scale bar = 50  $\mu$ m.

**Figure S8. Workflow of RNA-seq data analyses presented in Figures 2, 3 and 6.**

**Supplemental Table S1. Sequences of quantitative RT-PCR primers**

| <i>Target gene</i> |                | <i>Sequence primers</i>        |
|--------------------|----------------|--------------------------------|
| <i>mAurkB</i>      | <i>forward</i> | 5'-TCGGGGTGCTCTGCTATGAA -3'    |
|                    | <i>reverse</i> | 5'-CCACCTTGACAATCCGACGA -3'    |
| <i>mPappa2</i>     | <i>forward</i> | 5'-CAGCCCTTGTCATTGACTGTG T -3' |
|                    | <i>reverse</i> | 5'-AGCAACCCAGCCATCATTG -3'     |
| <i>mMafA</i>       | <i>forward</i> | 5'-CATTCTGGAGAGCGAGAAGTG-3'    |
|                    | <i>reverse</i> | 5'-TTTCTCCTTGACAGGTCCCG -3'    |
| <i>mKi67</i>       | <i>forward</i> | 5'-CTGCCTGCGAAGAGAGCATC -3'    |
|                    | <i>reverse</i> | 5'-AGCTCCACTTCGCCTTTTGG -3'    |
| <i>mS9</i>         | <i>forward</i> | 5'-CTCCGGAACAAACGTGAGGT-3'     |



|              |                |                                |
|--------------|----------------|--------------------------------|
|              | <i>reverse</i> | 5'-TCCAGCTTCATCTTGCCCTC -3'    |
| <i>mHprt</i> | <i>forward</i> | 5'-GATTTTATCAGACTGAAGAGC-3'    |
|              | <i>reverse</i> | 5'-TCCAGTTAAAGTTGAGAGAGATC -3' |

## Supplemental Datasets

**Dataset S1.** List of differentially expressed genes (related to Figure 2, Figure S3).

**Dataset S2.** Gene distribution within the rhythmicity models between control  $\alpha$ - and control  $\beta$ -cells (related to Figure 3).

**Dataset S3.** Gene distribution within the rhythmicity models between control and DOX treated  $\beta$ -cells (related to Figure 3).

**Dataset S4.** Gene distribution within the rhythmicity models between DOX treated  $\alpha$ - and  $\beta$ -cells (related to Figure 3).

**Dataset S5.** Gene distribution within the rhythmicity models between control and DOX treated  $\alpha$ -cells (related to Figure 3).

**Dataset S6.** Circadian rhythmic genes exhibiting phase shift in different conditions and cells.

**Dataset S7.** List of differentially expressed genes between  $\beta$ -cells from *Bmal1*<sup>st/st</sup> and *Bmal1*<sup>+/st</sup> mice treated with DOX.

**Dataset S8.** List of differentially expressed genes between  $\beta$ -cells from *Bmal1*<sup>st/st</sup> treated with DOX or untreated controls.

**Dataset S9.** List of the genes selected for the algorithm entrainment.

## References

- Parnaud, G., Bosco, D., Berney, T., Pattou, F., Kerr-Conte, J., Donath, M.Y., Bruun, C., Mandrup-Poulsen, T., Billestrup, N., and Halban, P.A. (2008). Proliferation of sorted human and rat beta cells. *Diabetologia* 51, 91-100.
- Petrenko, V., Gosmain, Y., and Dibner, C. (2017). High-Resolution Recording of the Circadian Oscillator in Primary Mouse alpha- and beta-Cell Culture. *Front Endocrinol (Lausanne)* 8, 68.
- Pulimeno, P., Mannic, T., Sage, D., Giovannoni, L., Salmon, P., Lemeille, S., Giry-Laterriere, M., Unser, M., Bosco, D., Bauer, C., et al. (2013). Autonomous and self-sustained circadian oscillators displayed in human islet cells. *Diabetologia* 56, 497-507.

A

## MODEL

## SAMPLING

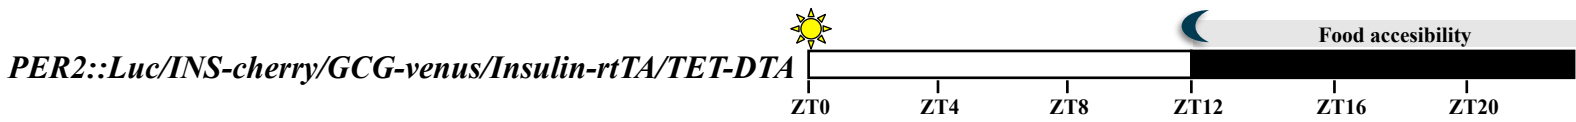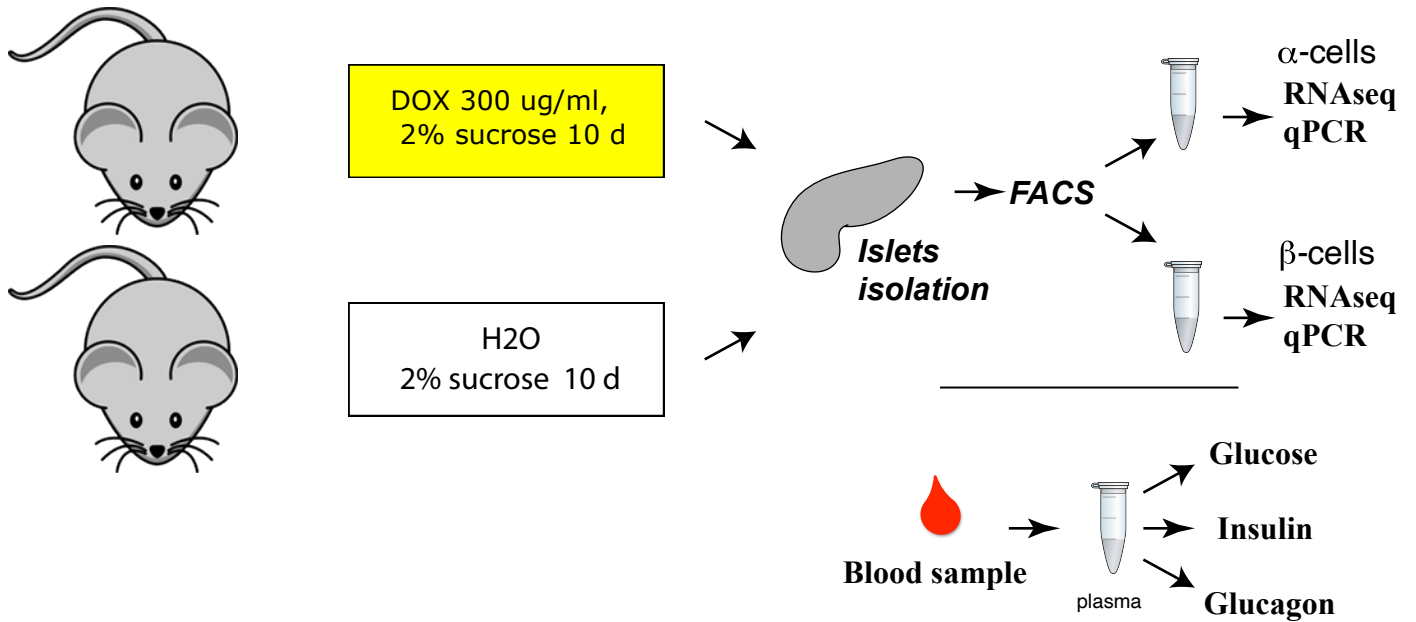

B

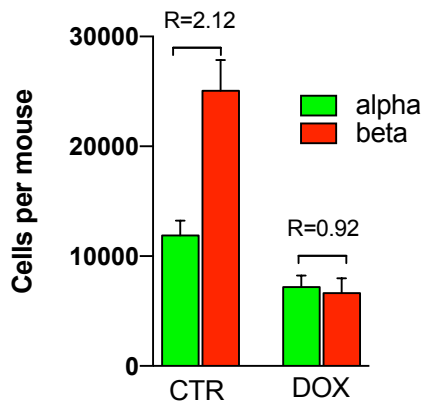

C

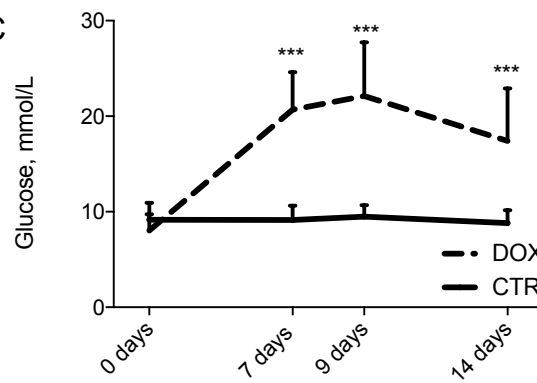

D

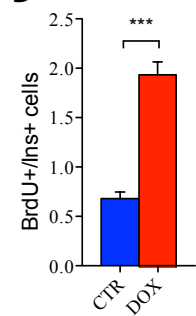

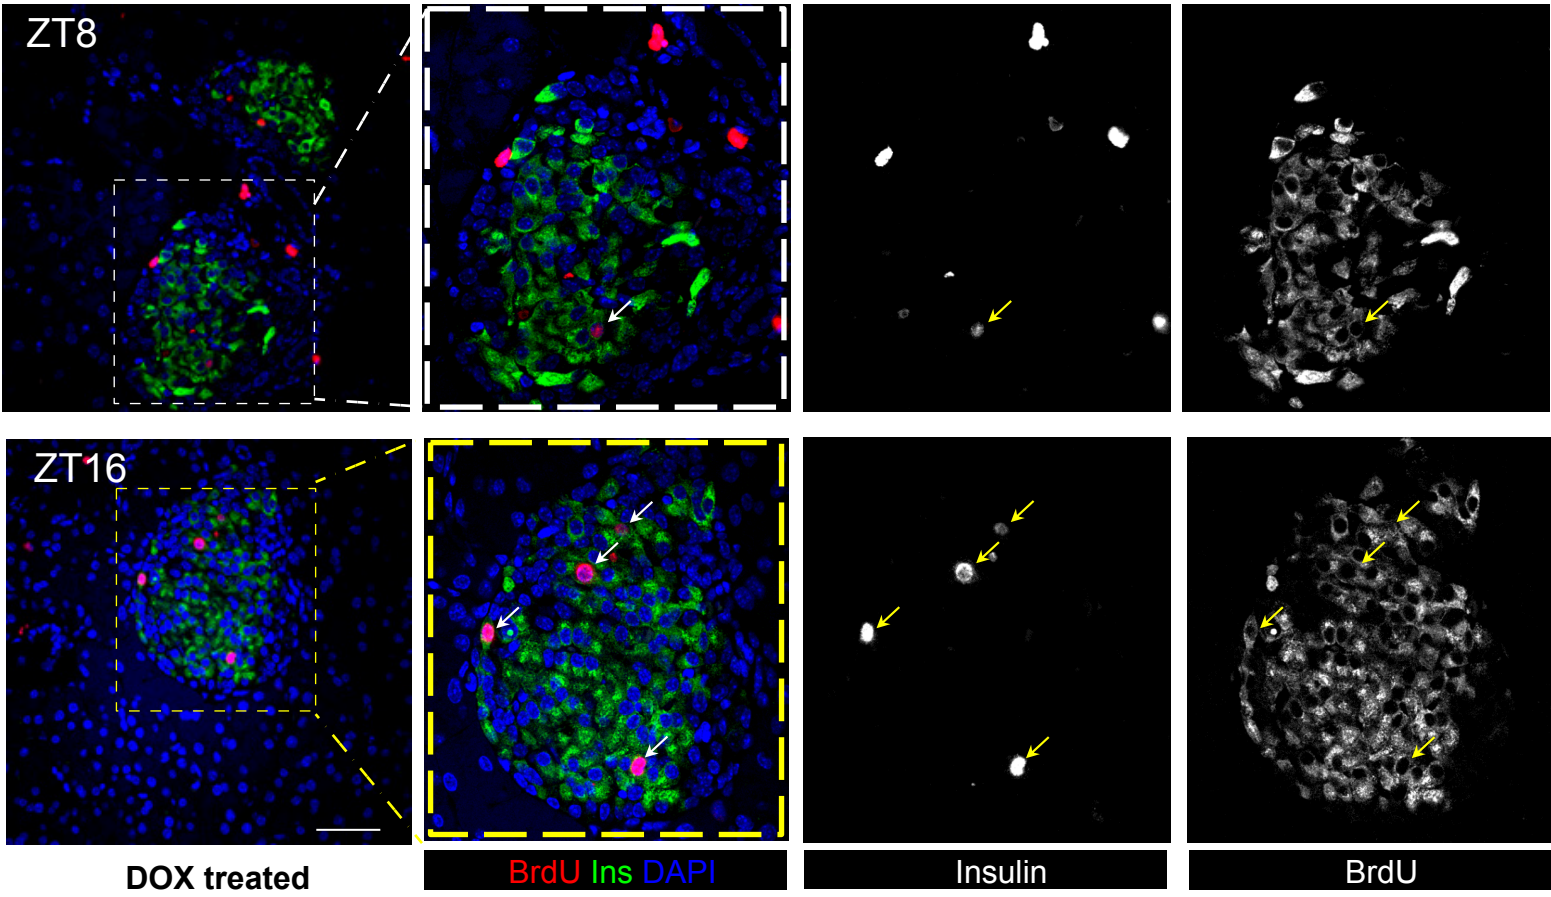

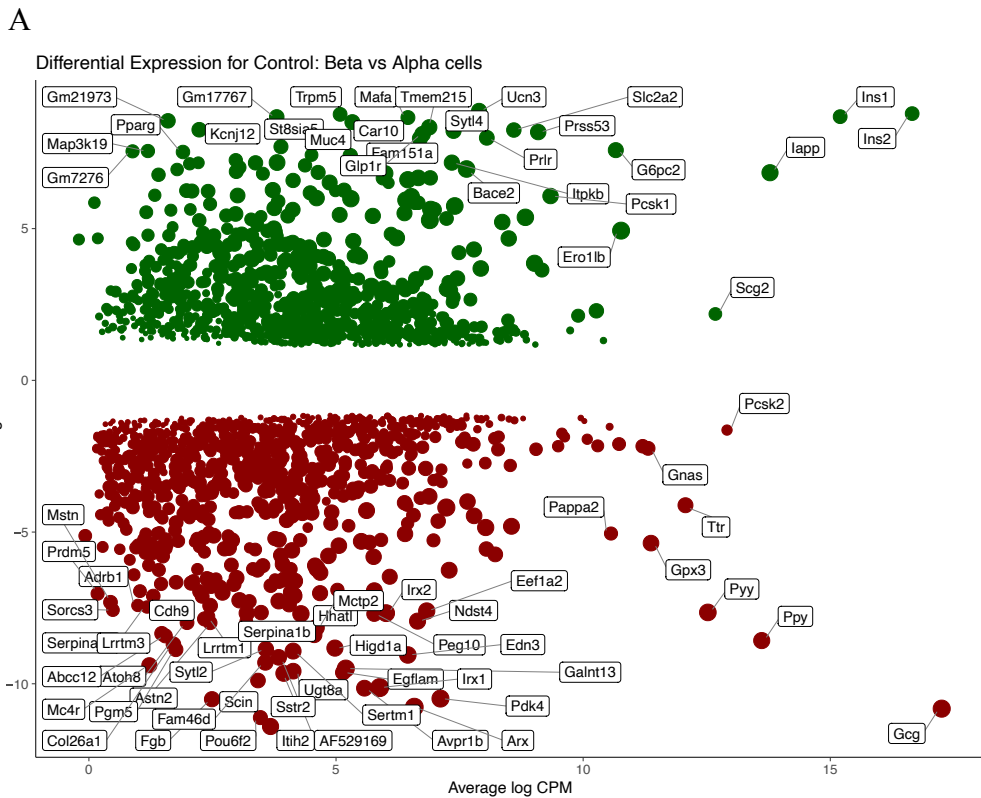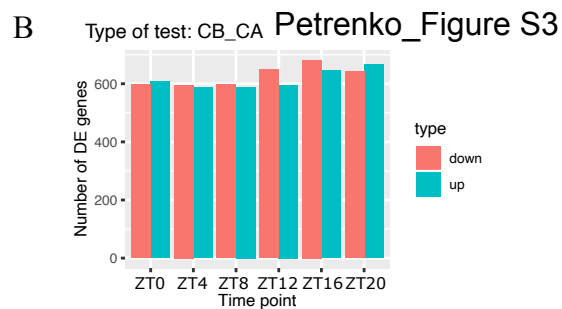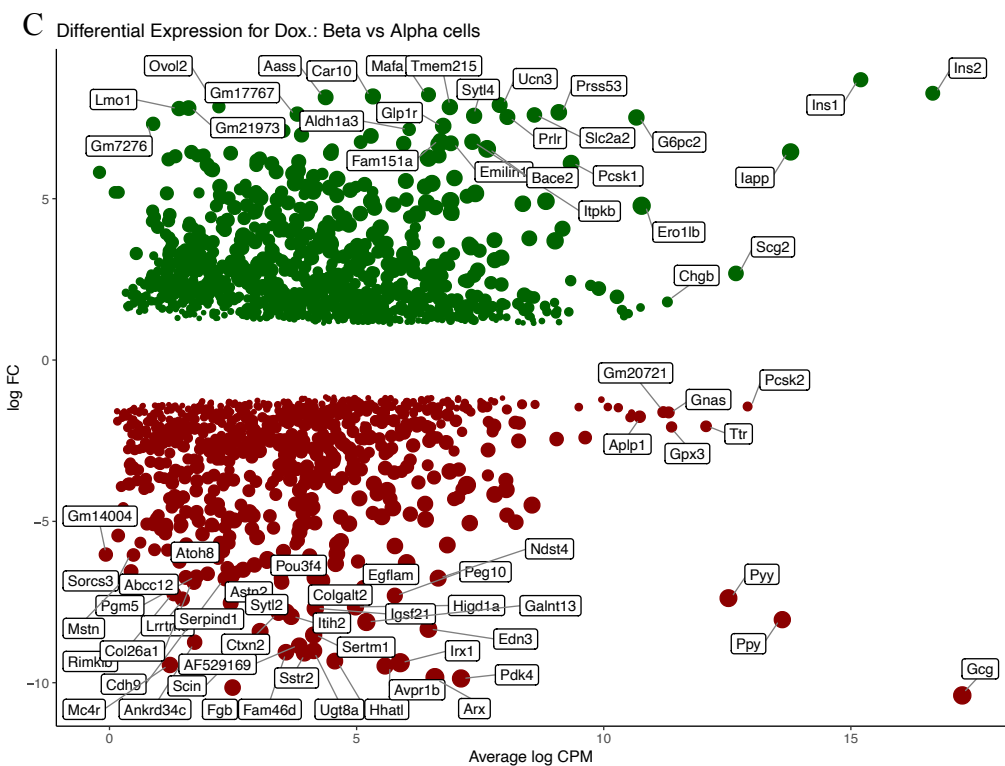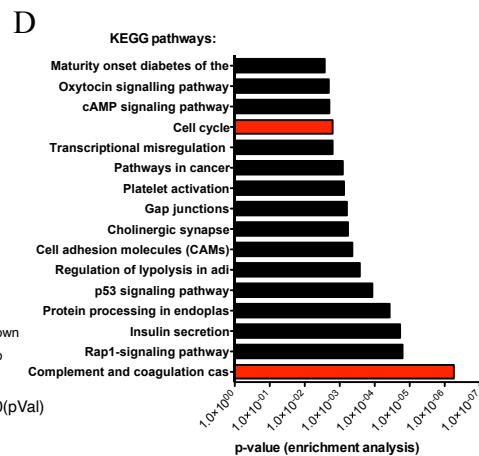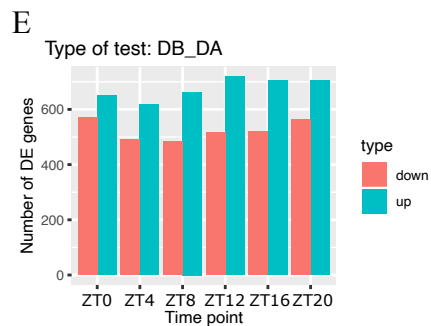

A

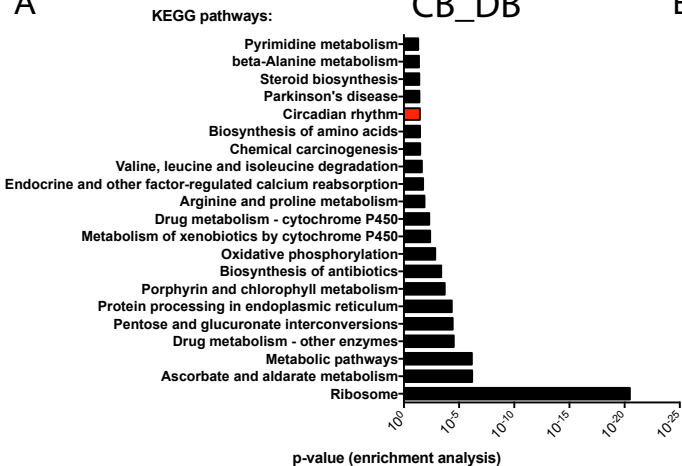

B

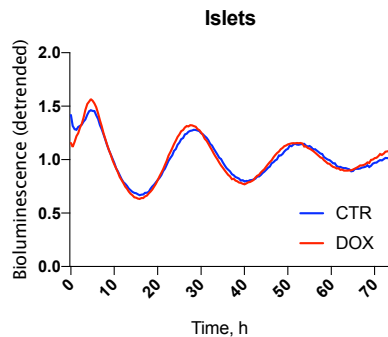

C

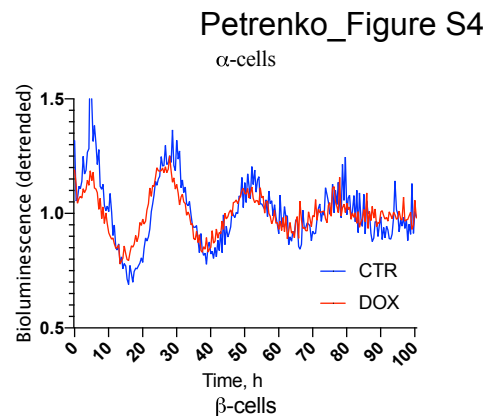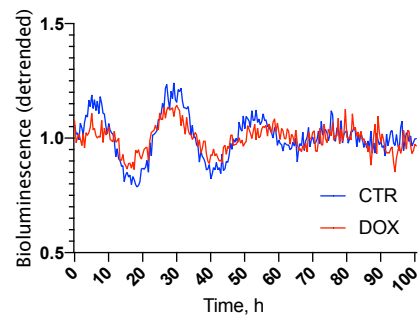

D

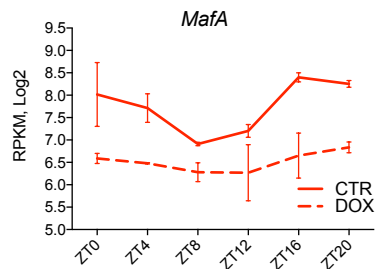

E

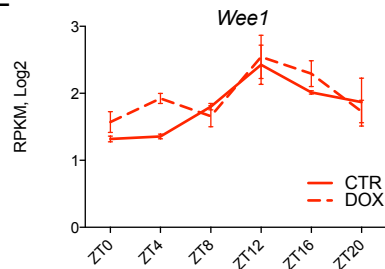

A

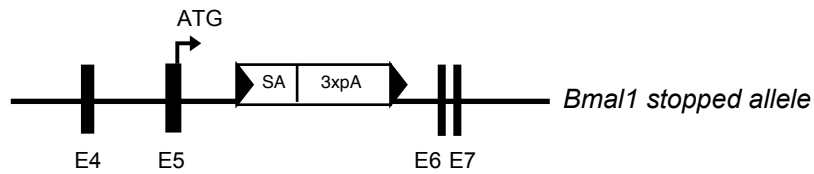

B

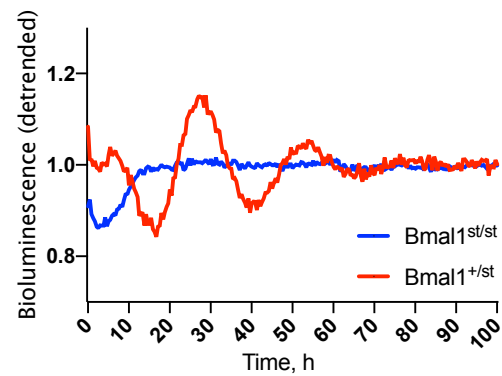

C

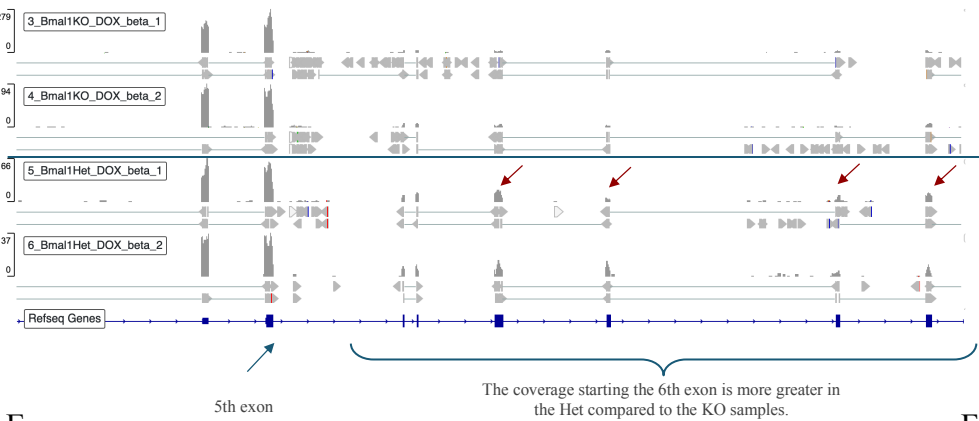

D

TOP CANONICAL PATHWAYS

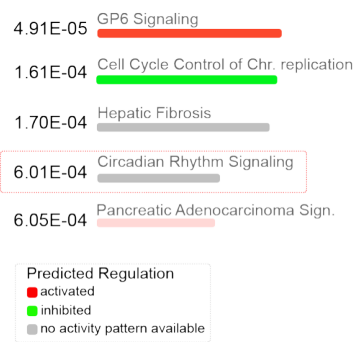

E

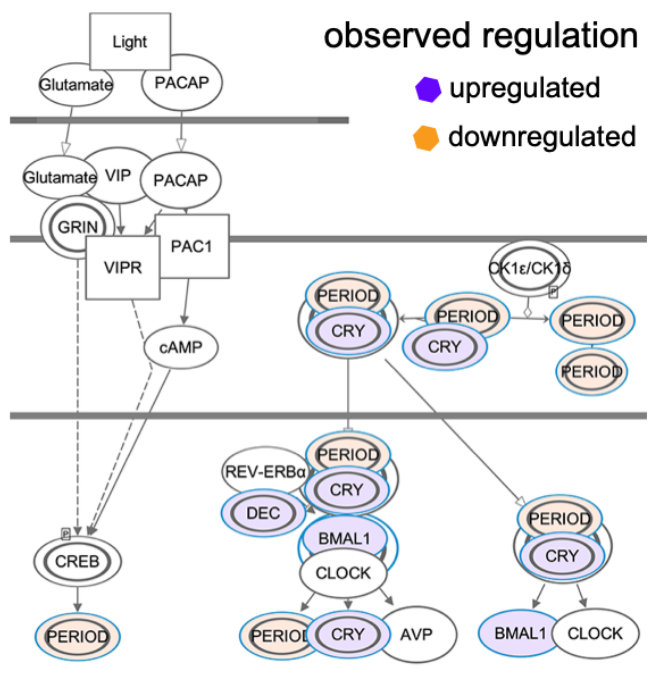

F

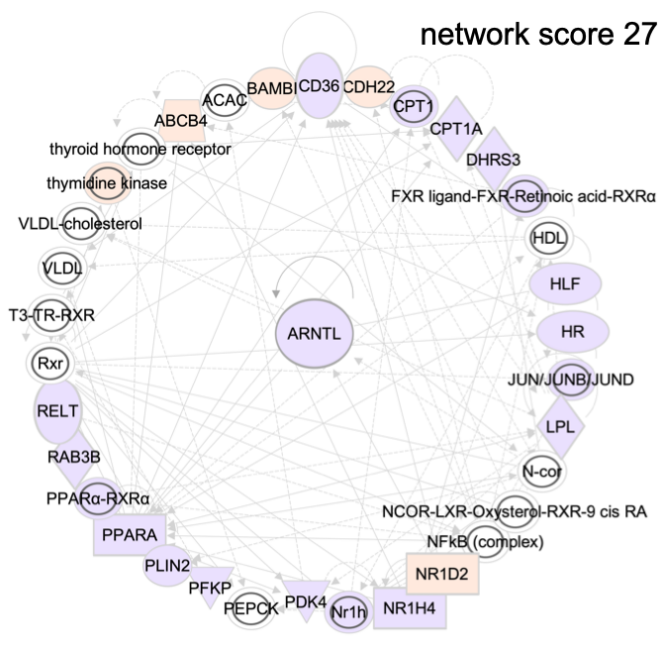

G

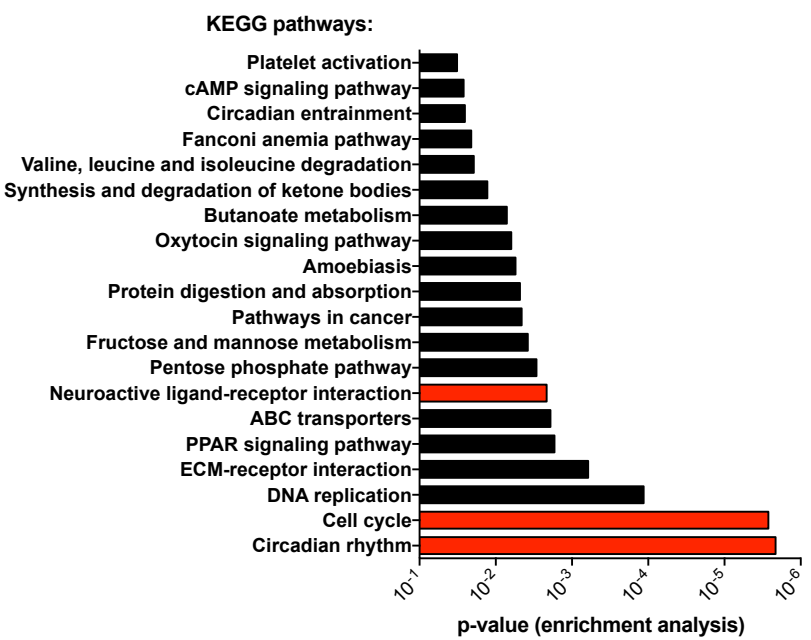

A

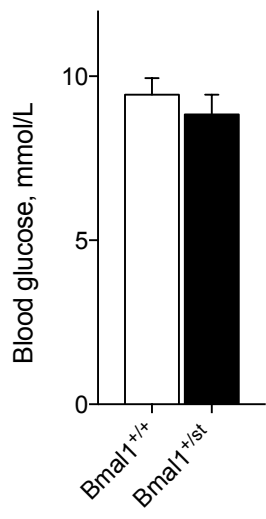

B

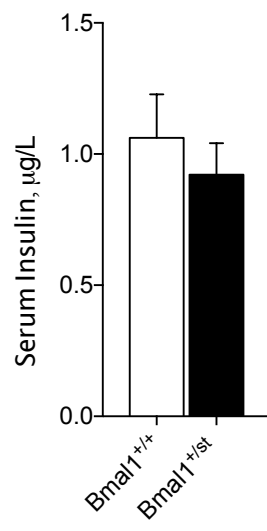

C

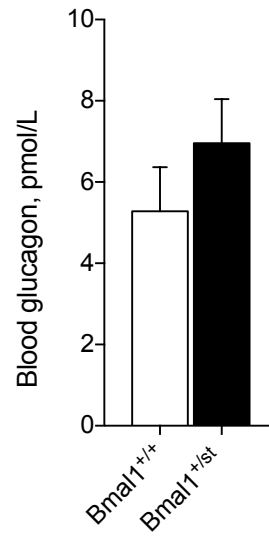



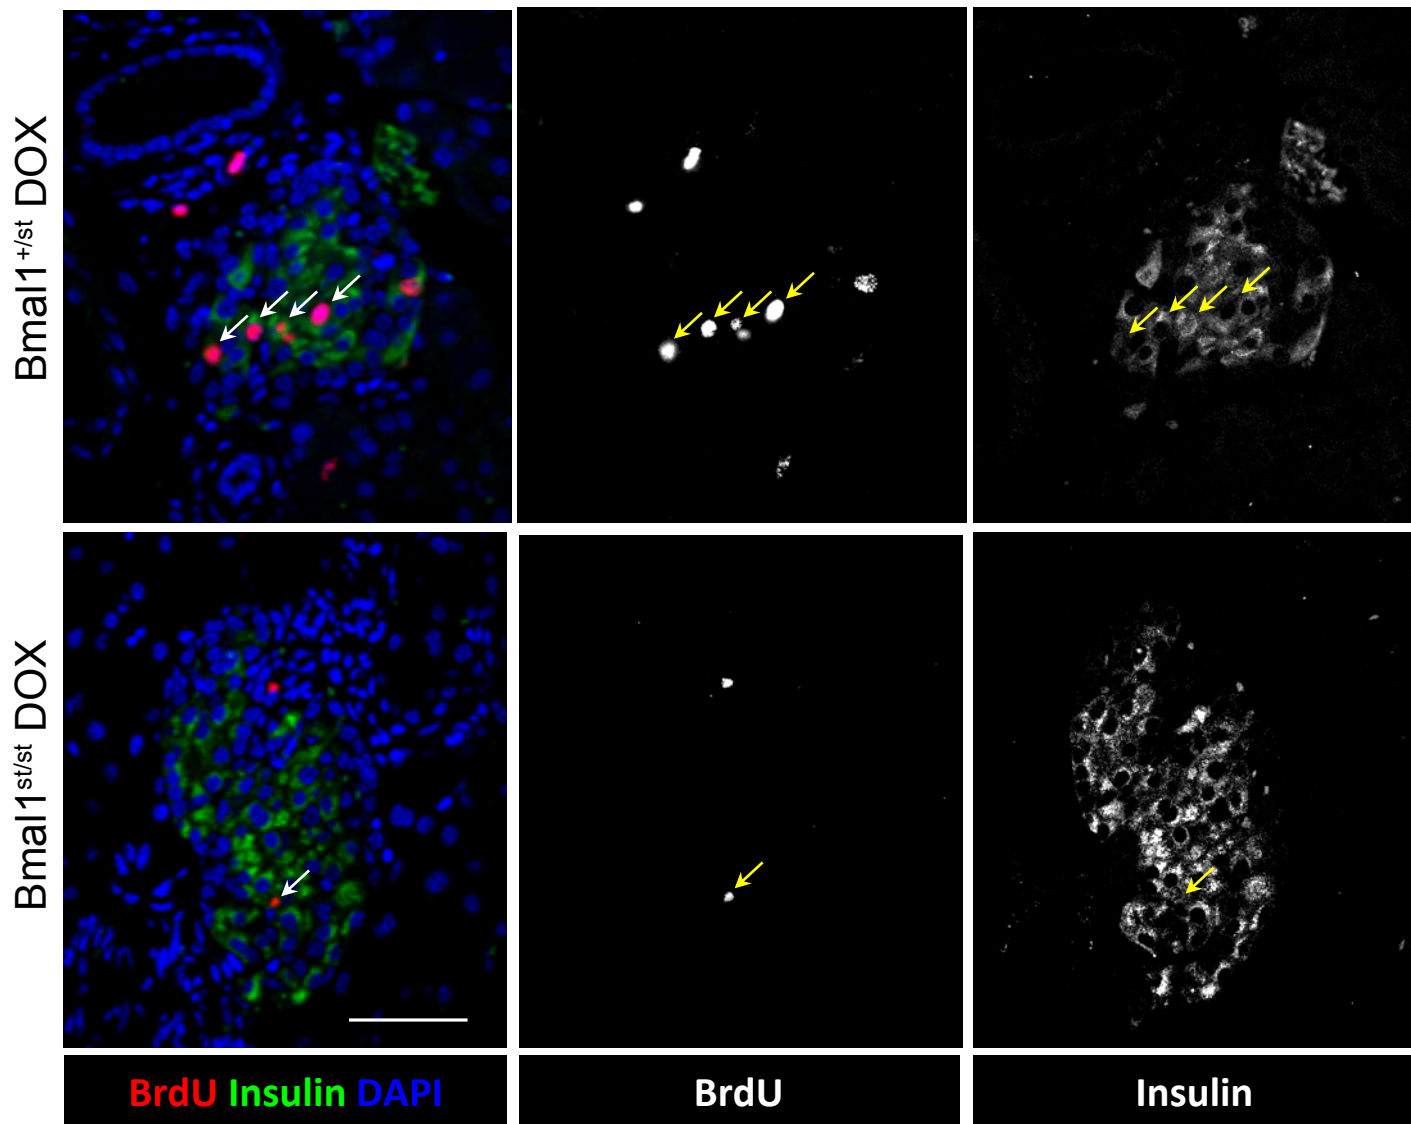

Analysis Workflow

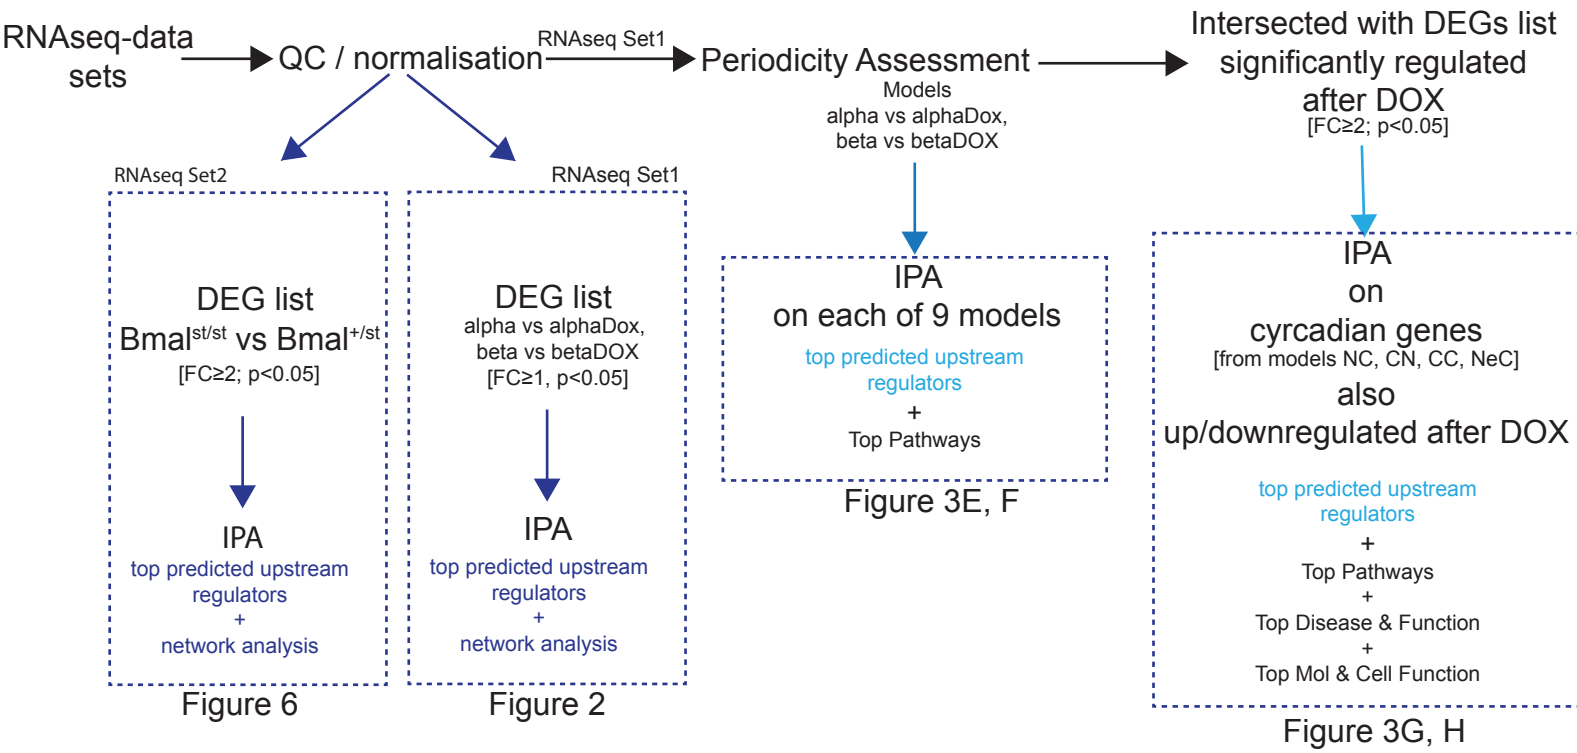

Supplement: supp_gad.343137.120_Supplemental_Materials_merged.pdf [file supp_gad.343137.120_Supplemental_Materials_merged.pdf]
